# Supplementary material for: Effect of Cation Chloride Concentration on the Dissolution Rates of Basaltic Glass and Labradorite at pH 3.6 and 25°C and Applica-Tion to Subsurface Carbon Storage
Source: Preprints.org preprint supplement (doi:10.20944/preprints202304.0035.v1), 2023-04-04
Supplement: Supplementary file 4 [file supplementary]

**Supplementary Material**

Appendix A: Summary of all fluid sample measurements

Experimental Series Basaltic Glass G-10

| Experiment ID | Experimental sample | Elapsed time (hours) | Reactor Temp. (T °C) | Fluid flow rate  (g/min) | Outlet pH | Inlet pH | [Si] (ppm) |
| --- | --- | --- | --- | --- | --- | --- | --- |
| G-NaCl-10 | A0 | 0 | 25.0 | 1.30 |  |  | 0 |
|  | A1 | 74 | 25.2 | 0.84 | 3.71 | 3.59 | 0.27 |
|  | A2 | 100 | 25.3 | 0.80 | 3.57 | 3.59 | 0.23 |
|  | A3 | 141 | 25.3 | 0.90 | 3.80 | 3.59 | 0.23 |
|  | A4 | 163 | 25.3 | 0.85 | 3.64 | 3.59 | 0.24 |
|  | A5 | 173 | 25.1 | 0.89 | 3.58 | 3.59 | 0.23 |
|  | A6 | 187 | 25.1 | 0.80 | 3.65 | 3.59 | 0.24 |
|  | A7 | 197 | 25.2 | 0.86 | 3.63 | 3.59 | 0.27 |
|  | A8 | 210 | 25.2 | 0.87 | 3.74 | 3.59 | 0.24 |
| G-KCl-10 | A9 | 307 | 25.0 | 0.93 | 3.59 | 3.57 | 0.18 |
|  | A10 | 317 | 25.0 | 0.88 | 3.66 | 3.57 | 0.16 |
|  | A11 | 331 | 25.0 | 0.87 | 3.61 | 3.57 | 0.18 |
|  | A12 | 341 | 25.0 | 0.86 | 3.59 | 3.57 | 0.19 |
|  | A13 | 355 | 25.0 | 0.86 | 3.60 | 3.57 | 0.18 |
|  | A14 | 365 | 25.0 | 0.86 | 3.58 | 3.57 | 0.18 |
|  | A15 | 379 | 25.0 | 0.85 | 3.60 | 3.57 | 0.22 |
|  | A16 | 386 | 25.0 | 0.86 | 3.58 | 3.57 | 0.22 |
| G-CaCl2-10 | A17 | 477 | 25.0 | 0.86 | 3.59 | 3.55 | 0.42 |
|  | A18 | 486 | 25.0 | 0.86 | 3.67 | 3.55 | 0.44 |
|  | A19 | 499 | 25.0 | 0.85 | 3.62 | 3.55 | 0.45 |
|  | A20 | 509 | 25.0 | 0.86 | 3.64 | 3.55 | 0.44 |
|  | A21 | 523 | 25.0 | 0.85 | 3.66 | 3.55 | 0.45 |
|  | A22 | 532 | 25.0 | 0.86 | 3.63 | 3.55 | 0.46 |
|  | A23 | 547 | 25.0 | 0.86 | 3.59 | 3.55 | 0.51 |
|  | A24 | 557 | 25.0 | 0.86 | 3.55 | 3.55 | 0.49 |
|  | A25 | 571 | 25.0 | 0.85 | 3.58 | 3.55 | 0.48 |
|  | A26 | 579 | 25.0 | 0.86 | 3.56 | 3.55 | 0.49 |
| G-MgCl2-10 | A27 | 666 | 25.0 | 0.82 | 3.64 | 3.56 | 0.49 |
|  | A28 | 692 | 25.0 | 0.83 | 3.97 | 3.56 | 0.49 |
|  | A29 | 700 | 25.0 | 0.84 | 3.60 | 3.56 | 0.49 |
|  | A30 | 714 | 25.0 | 0.84 | 3.51 | 3.56 | 0.50 |
|  | A31 | 724 | 25.0 | 0.84 | 3.55 | 3.56 | 0.49 |
|  | A32 | 739 | 25.0 | 0.84 | 3.45 | 3.56 | 0.48 |
|  | A33 | 747 | 25.0 | 0.82 | 3.57 | 3.56 | 0.58 |
|  | A34 | 764 | 25.0 | 0.84 | 3.72 | 3.56 | 0.55 |
|  | A35 | 773 | 25.0 | 0.84 | 3.75 | 3.56 | 0.55 |
|  | A36 | 788 | 25.0 | 0.84 | 3.69 | 3.56 | 0.53 |

Experimental Series Basaltic Glass G-100

| Experiment ID | Experimental sample | Elapsed time (hours) | Reactor Temp. (T °C) | Fluid flow rate  (g/min) | Outlet pH | Inlet pH | [Si] (ppm) |
| --- | --- | --- | --- | --- | --- | --- | --- |
| G-NaCl-100 | B0 | 0 |  | 1.30 |  |  | 0 |
|  | B1 | 74 | 23.3 | 1.07 | 3.85 | 3.68 | 0.27 |
|  | B2 | 100 | 22.7 | 1.09 | 3.75 | 3.68 | 0.24 |
|  | B3 | 141 | 23 | 1.04 | 3.82 | 3.68 | 0.25 |
|  | B4 | 163 | 23.6 | 0.99 | 3.78 | 3.68 | 0.26 |
|  | B5 | 173 | 22.9 | 0.99 | 3.80 | 3.68 | 0.25 |
|  | B6 | 187 | 23.2 | 1.01 | 3.83 | 3.68 | 0.28 |
|  | B7 | 197 | 22 | 1.02 | 3.78 | 3.68 | 0.29 |
|  | B8 | 210 | 24.1 | 1.08 | 3.79 | 3.68 | 0.25 |
| G-KCl-100 | B9 | 307 | 22.9 | 0.97 | 3.66 | 3.65 | 0.14 |
|  | B10 | 317 | 22 | 0.94 | 3.61 | 3.65 | 0.19 |
|  | B11 | 331 | 23.1 | 0.93 | 3.64 | 3.65 | 0.17 |
|  | B12 | 341 | 22.5 | 0.93 | 3.67 | 3.65 | 0.19 |
|  | B13 | 355 | 23.1 | 0.92 | 3.66 | 3.65 | 0.17 |
|  | B14 | 365 | 22.4 | 0.92 | 3.67 | 3.65 | 0.20 |
|  | B15 | 379 | 23 | 0.92 | 3.68 | 3.65 | 0.18 |
|  | B16 | 386 | 23.3 | 0.92 | 3.69 | 3.65 | 0.60 |
| G-CaCl2-100 | B17 | 477 | 22.4 | 0.91 | 3.66 | 3.53 | 0.41 |
|  | B18 | 486 | 21.7 | 0.91 | 3.68 | 3.53 | 0.41 |
|  | B19 | 499 | 22.4 | 0.90 | 3.67 | 3.53 | 0.40 |
|  | B20 | 509 | 21.2 | 0.90 | 3.66 | 3.53 | 0.41 |
|  | B21 | 523 | 22.3 | 0.89 | 3.68 | 3.53 | 0.40 |
|  | B22 | 532 | 21.7 | 0.90 | 3.65 | 3.53 | 0.41 |
|  | B23 | 547 | 22.4 | 0.90 | 3.64 | 3.53 | 0.46 |
|  | B24 | 557 | 21.5 | 0.90 | 3.65 | 3.53 | 0.48 |
|  | B25 | 571 | 22.4 | 0.90 | 3.64 | 3.53 | 0.47 |
|  | B26 | 579 | 23.1 | 0.91 | 3.63 | 3.53 | 0.46 |
| G-MgCl2-100 | B27 | 666 | 22.4 | 0.90 | 3.66 | 3.59 | 0.38 |
|  | B28 | 692 | 22.2 | 0.91 | 3.82 | 3.59 | 0.35 |
|  | B29 | 700 | 21.1 | 0.91 | 3.64 | 3.59 | 0.35 |
|  | B30 | 714 | 22.2 | 0.89 | 3.55 | 3.59 | 0.35 |
|  | B31 | 724 | 21.9 | 0.91 | 3.54 | 3.59 | 0.35 |
|  | B32 | 739 | 21.8 | 0.92 | 3.54 | 3.59 | 0.35 |
|  | B33 | 747 | 22.8 | 0.90 | 3.60 | 3.59 | 0.40 |
|  | B34 | 764 | 22 | 0.92 | 3.62 | 3.59 | 0.38 |
|  | B35 | 773 | 21.7 | 0.92 | 3.65 | 3.59 | 0.38 |
|  | B36 | 788 | 22.4 | 0.92 | 3.74 | 3.59 | 0.99 |

Experimental Series Basaltic Glass G-700

| Experiment ID | Experimental sample | Elapsed time (hours) | Reactor Temp. (T °C) | Fluid flow rate  (g/min) | Outlet pH | Inlet pH | [Si] (ppm) |
| --- | --- | --- | --- | --- | --- | --- | --- |
| G-NaCl-700 | C0 | 0 | 25.00 | 1.30 |  |  | 0 |
|  | C1 | 74 | 25.2 | 1.16 | 3.96 | 3.57 | 0.14 |
|  | C2 | 100 | 25.3 | 1.15 | 3.71 | 3.57 | 0.16 |
|  | C3 | 141 | 25.3 | 1.09 | 3.66 | 3.57 | 0.17 |
|  | C4 | 163 | 25.3 | 1.07 | 3.61 | 3.57 | 0.16 |
|  | C5 | 173 | 25.1 | 1.08 | 3.60 | 3.57 | 0.17 |
|  | C6 | 187 | 25.1 | 1.00 | 3.62 | 3.57 | 0.17 |
|  | C7 | 197 | 25.2 | 1.05 | 3.57 | 3.57 | 0.13 |
|  | C8 | 210 | 25.2 | 1.05 | 3.97 | 3.57 | 1.29 |
| G-KCl-700 | C9 | 307 | 25.0 | 0.99 | 3.59 | 3.64 | 0.15 |
|  | C10 | 317 | 25.0 | 0.87 | 3.58 | 3.64 | 0.15 |
|  | C11 | 331 | 25.0 | 0.88 | 3.57 | 3.64 | 0.15 |
|  | C12 | 341 | 25.0 | 0.88 | 3.58 | 3.64 | 0.18 |
|  | C13 | 355 | 25.0 | 0.91 | 3.57 | 3.64 | 0.14 |
|  | C14 | 365 | 25.0 | 0.92 | 3.57 | 3.64 | 0.15 |
|  | C15 | 379 | 25.0 | 0.90 | 3.60 | 3.64 | 0.23 |
|  | C16 | 386 | 25.0 | 0.91 | 3.57 | 3.64 | 0.18 |
| G-CaCl2-700 | C17 | 477 | 25.0 | 0.87 | 3.76 | 3.56 | 0.48 |
|  | C18 | 486 | 25.0 | 0.97 | 3.76 | 3.56 | 0.35 |
|  | C19 | 499 | 25.0 | 0.97 | 3.73 | 3.56 | 0.33 |
|  | C20 | 509 | 25.0 | 0.97 | 3.79 | 3.56 | 0.34 |
|  | C21 | 523 | 25.0 | 0.97 | 3.74 | 3.56 | 0.36 |
|  | C22 | 532 | 25.0 | 0.97 | 3.71 | 3.56 | 0.35 |
|  | C23 | 547 | 25.0 | 0.96 | 3.70 | 3.56 | 0.42 |
|  | C24 | 557 | 25.0 | 0.96 | 3.70 | 3.56 | 0.43 |
|  | C25 | 571 | 25.0 | 0.96 | 3.75 | 3.56 | 0.40 |
|  | C26 | 579 | 25.0 | 0.96 | 3.79 | 3.56 | 0.92 |
| G-MgCl2-700 | C27 | 666 | 25.0 | 0.95 | 4.50 | 3.63 | 0.22 |
|  | C28 | 692 | 25.0 | 0.95 | 3.48 | 3.63 | 0.44 |
|  | C29 | 700 | 25.0 | 0.95 | 3.30 | 3.63 | 0.44 |
|  | C30 | 714 | 25.0 | 0.84 | 3.45 | 3.63 | 0.22 |
|  | C31 | 724 | 25.0 | 0.95 | 3.50 | 3.63 | 0.24 |
|  | C32 | 739 | 25.0 | 0.95 | 3.62 | 3.63 | 0.18 |
|  | C33 | 747 | 25.0 | 0.93 | 3.93 | 3.63 | 0.23 |
|  | C34 | 764 | 25.0 | 0.87 | 3.64 | 3.65 | 0.22 |
|  | C35 | 773 | 25.0 | 0.96 | 3.58 | 3.65 | 0.19 |
|  | C36 | 788 | 25.0 | 0.96 | 3.61 | 3.65 | 0.14 |
|  | C37 | 810 | 25.0 | 0.95 | 3.68 | 3.65 | 0.18 |
|  | C38 | 832 | 25.0 | 0.97 | 3.55 | 3.65 | 0.21 |
|  | C39 | 854 | 25.0 | 0.97 | 3.74 | 3.65 | 0.35 |

Experimental Series Labradorite L-10

| Experiment ID | Experimental sample | Elapsed time (hours) | Reactor Temp. (T °C) | Fluid flow rate  (g/min) | Outlet pH | Inlet pH | [Si] (ppm) |
| --- | --- | --- | --- | --- | --- | --- | --- |
| L-NaCl-10 | A39 | 0 | 25.0 | 1.30 |  |  | 0 |
|  | A40 | 66 | 25.0 | 0.76 | 3.77 | 3.68 | 0.68 |
|  | A41 | 74 | 25.0 | 0.76 | 3.78 | 3.68 | 0.66 |
|  | A42 | 88 | 25.0 | 0.76 | 3.78 | 3.68 | 0.68 |
|  | A43 | 97 | 25.0 | 0.85 | 3.78 | 3.68 | 0.57 |
|  | A44 | 112 | 25.0 | 0.85 | 3.75 | 3.68 | 0.58 |
|  | A45 | 121 | 25.0 | 0.85 | 3.77 | 3.68 | 0.57 |
|  | A46 | 137 | 25.0 | 0.85 | 3.78 | 3.68 | 0.53 |
|  | A47 | 146 | 25.0 | 0.85 | 3.76 | 3.68 | 0.52 |
|  | A48 | 162 | 25.0 | 0.82 | 3.78 | 3.68 | 0.50 |
|  | A49 | 185 | 25.0 | 0.85 | 3.76 | 3.68 | 0.51 |
|  | A50 | 194 | 25.0 | 0.84 | 3.75 | 3.68 | 0.50 |
|  | A51 | 208 | 25.0 | 0.85 | 3.75 | 3.68 | 0.50 |
| L-KCl-10 | A52 | 287 | 25.0 | 0.91 | 3.73 | 3.62 | 0.58 |
|  | A53 | 304 | 25.0 | 0.84 | 3.73 | 3.62 | 0.55 |
|  | A54 | 313 | 25.0 | 0.84 | 3.72 | 3.62 | 0.51 |
|  | A55 | 329 | 25.0 | 0.83 | 3.72 | 3.62 | 0.47 |
|  | A56 | 339 | 25.0 | 0.83 | 3.73 | 3.62 | 0.45 |
|  | A57 | 353 | 25.0 | 0.83 | 3.74 | 3.62 | 0.44 |
|  | A58 | 376 | 25.0 | 0.83 | 3.72 | 3.62 | 0.39 |
|  | A59 | 385 | 25.0 | 0.82 | 3.69 | 3.62 | 0.37 |
|  | A60 | 400 | 25.0 | 0.83 | 3.68 | 3.62 | 0.37 |
|  | A61 | 410 | 25.0 | 0.83 | 3.69 | 3.62 | 0.37 |
|  | A62 | 431 | 25.0 | 0.83 | 3.72 | 3.62 | 0.30 |
| L-CaCl2-10 | A63 | 497 | 25.0 | 0.86 | 3.66 | 3.64 | 0.19 |
|  | A64 | 506 | 25.0 | 0.86 | 3.65 | 3.64 | 0.18 |
|  | A65 | 526 | 25.0 | 0.85 | 3.66 | 3.64 | 0.17 |
|  | A66 | 544 | 25.0 | 0.85 | 3.64 | 3.64 | 0.18 |
|  | A67 | 553 | 25.0 | 0.86 | 3.66 | 3.64 | 0.17 |
|  | A68 | 568 | 25.0 | 0.84 | 3.65 | 3.64 | 0.17 |
|  | A69 | 578 | 25.0 | 0.85 | 3.65 | 3.64 | 0.17 |
|  | A70 | 592 | 25.0 | 0.85 | 3.66 | 3.64 | 0.19 |
|  | A71 | 602 | 25.0 | 0.85 | 3.65 | 3.64 | 0.19 |
|  | A72 | 616 | 25.0 | 0.85 | 3.65 | 3.64 | 0.18 |
|  | A73 | 626 | 25.0 | 0.85 | 3.66 | 3.64 | 0.18 |
|  | A74 | 637 | 25.0 | 0.85 | 3.64 | 3.64 | 0.17 |
|  | A75 | 650 | 25.0 | 0.85 | 3.64 | 3.64 | 0.17 |
|  | A76 | 667 | 25.0 | 0.85 | 3.66 | 3.64 | 0.27 |
| L-MgCl2-10 | A77 | 736 | 25.0 | 0.87 | 3.65 | 3.64 | 0.23 |
|  | A78 | 745 | 25.0 | 0.86 | 3.65 | 3.64 | 0.21 |
|  | A79 | 760 | 25.0 | 0.85 | 3.65 | 3.64 | 0.19 |
|  | A80 | 770 | 25.0 | 0.86 | 3.66 | 3.64 | 0.21 |
|  | A81 | 784 | 25.0 | 0.87 | 3.65 | 3.64 | 0.20 |
|  | A82 | 794 | 25.0 | 0.87 | 3.65 | 3.64 | 0.17 |
|  | A83 | 808 | 25.0 | 0.87 | 3.65 | 3.64 | 0.19 |
|  | A84 | 818 | 25.0 | 0.87 | 3.66 | 3.64 | 0.17 |
|  | A85 | 838 | 25.0 | 0.86 | 3.65 | 3.64 | 0.16 |
|  | A86 | 857 | 25.0 | 0.86 | 3.64 | 3.64 | 0.16 |
|  | A87 | 865 | 25.0 | 0.87 | 3.65 | 3.64 | 0.15 |
|  | A88 | 880 | 25.0 | 0.86 | 3.66 | 3.64 | 0.14 |
|  | A89 | 890 | 25.0 | 0.86 | 3.66 | 3.64 | 0.15 |

Experimental Series Labradorite L-50

| Experiment ID | Experimental sample | | Elapsed time (hours) | Reactor Temp. (T °C) | Fluid flow rate  (g/min) | Outlet pH | Inlet pH | [Si] (ppm) |
| --- | --- | --- | --- | --- | --- | --- | --- | --- |
| L-NaCl-50 | | B39 | 0 | 25.0 | 1.20 |  |  | 0 |
|  | | B40 | 66 | 25.0 | 0.87 | 3.73 | 3.63 | 0.46 |
|  | | B41 | 74 | 25.0 | 0.86 | 3.75 | 3.63 | 0.44 |
|  | | B42 | 88 | 25.0 | 0.87 | 3.76 | 3.63 | 0.48 |
|  | | B43 | 97 | 25.0 | 0.87 | 3.75 | 3.63 | 0.48 |
|  | | B44 | 112 | 25.0 | 0.86 | 3.75 | 3.63 | 0.45 |
|  | | B45 | 121 | 25.0 | 0.86 | 3.75 | 3.63 | 0.44 |
|  | | B46 | 137 | 25.0 | 0.86 | 3.74 | 3.63 | 0.43 |
|  | | B47 | 146 | 25.0 | 0.86 | 3.72 | 3.63 | 0.42 |
|  | | B48 | 162 | 25.0 | 0.86 | 3.73 | 3.63 | 0.41 |
|  | | B49 | 185 | 25.0 | 0.85 | 3.73 | 3.63 | 0.43 |
|  | | B50 | 194 | 25.0 | 0.86 | 3.70 | 3.63 | 0.41 |
|  | | B51 | 208 | 25.0 | 0.85 | 3.72 | 3.63 | 0.39 |
| L-KCl-50 | | B52 | 287 | 25.0 | 0.88 | 3.78 | 3.66 | 0.64 |
|  | | B53 | 304 | 25.0 | 0.88 | 3.77 | 3.66 | 0.61 |
|  | | B54 | 313 | 25.0 | 0.88 | 3.77 | 3.66 | 0.58 |
|  | | B55 | 329 | 25.0 | 0.87 | 3.75 | 3.66 | 0.54 |
|  | | B56 | 339 | 25.0 | 0.87 | 3.78 | 3.66 | 0.52 |
|  | | B57 | 353 | 25.0 | 0.87 | 3.77 | 3.66 | 0.50 |
|  | | B58 | 376 | 25.0 | 0.87 | 3.73 | 3.66 | 0.48 |
|  | | B59 | 385 | 25.0 | 0.88 | 3.74 | 3.66 | 0.48 |
|  | | B60 | 400 | 25.0 | 0.87 | 3.73 | 3.66 | 0.45 |
|  | | B61 | 410 | 25.0 | 0.86 | 3.74 | 3.66 | 0.46 |
|  | | B62 | 431 | 25.0 | 0.87 | 3.71 | 3.66 | 0.39 |
| L-CaCl2-50 | | B63 | 497 | 25.0 | 0.83 | 3.69 | 3.66 | 0.31 |
|  | | B64 | 506 | 25.0 | 0.83 | 3.70 | 3.66 | 0.27 |
|  | | B65 | 526 | 25.0 | 0.83 | 3.67 | 3.66 | 0.29 |
|  | | B66 | 544 | 25.0 | 0.83 | 3.69 | 3.66 | 0.28 |
|  | | B67 | 553 | 25.0 | 0.83 | 3.71 | 3.66 | 0.29 |
|  | | B68 | 568 | 25.0 | 0.82 | 3.71 | 3.66 | 0.29 |
|  | | B69 | 578 | 25.0 | 0.83 | 3.71 | 3.66 | 0.29 |
|  | | B70 | 592 | 25.0 | 0.83 | 3.72 | 3.66 | 0.29 |
|  | | B71 | 602 | 25.0 | 0.83 | 3.71 | 3.66 | 0.29 |
|  | | B72 | 616 | 25.0 | 0.83 | 3.72 | 3.66 | 0.30 |
|  | | B73 | 626 | 25.0 | 0.83 | 3.71 | 3.66 | 0.31 |
|  | | B74 | 637 | 25.0 | 0.83 | 3.72 | 3.66 | 0.29 |
|  | | B75 | 650 | 25.0 | 0.84 | 3.70 | 3.66 | 0.29 |
|  | | B76 | 667 | 25.0 | 0.84 | 3.70 | 3.66 | 0.35 |
| L-MgCl2-50 | | B77 | 736 | 25.0 | 0.86 | 3.71 | 3.68 | 0.27 |
|  | | B78 | 745 | 25.0 | 0.87 | 3.71 | 3.68 | 0.27 |
|  | | B79 | 760 | 25.0 | 0.86 | 3.72 | 3.68 | 0.25 |
|  | | B80 | 770 | 25.0 | 0.86 | 3.70 | 3.68 | 0.23 |
|  | | B81 | 784 | 25.0 | 0.86 | 3.71 | 3.68 | 0.26 |
|  | | B82 | 794 | 25.0 | 0.87 | 3.71 | 3.68 | 0.23 |
|  | | B83 | 808 | 25.0 | 0.86 | 3.72 | 3.68 | 0.24 |
|  | | B84 | 818 | 25.0 | 0.87 | 3.72 | 3.68 | 0.27 |
|  | | B85 | 838 | 25.0 | 0.86 | 3.72 | 3.68 | 0.23 |
|  | | B86 | 857 | 25.0 | 0.86 | 3.69 | 3.68 | 0.25 |
|  | | B87 | 865 | 25.0 | 0.86 | 3.69 | 3.68 | 0.21 |
|  | | B88 | 880 | 25.0 | 0.86 | 3.72 | 3.68 | 0.22 |
|  | | B89 | 890 | 25.0 | 0.86 | 3.71 | 3.68 | 0.23 |

Experimental Series Labradorite L-200

| Experiment ID | Experimental sample | Elapsed time (hours) | Reactor Temp. (T °C) | Fluid flow rate  (g/min) | Outlet pH | Inlet pH | [Si] (ppm) |
| --- | --- | --- | --- | --- | --- | --- | --- |
| L-NaCl-200 | C39 | 0 | 25.0 | 1.20 |  |  |  |
|  | C40 | 66 | 25.0 | 1.03 | 3.76 | 3.64 | 0.53 |
|  | C41 | 74 | 25.0 | 1.03 | 3.75 | 3.64 | 0.51 |
|  | C42 | 88 | 25.0 | 1.03 | 3.80 | 3.64 | 0.55 |
|  | C43 | 97 | 25.0 | 0.80 | 3.76 | 3.64 | 0.53 |
|  | C44 | 112 | 25.0 | 0.84 | 3.73 | 3.64 | 0.64 |
|  | C45 | 121 | 25.0 | 0.84 | 3.78 | 3.64 | 0.62 |
|  | C46 | 137 | 25.0 | 0.84 | 3.79 | 3.64 | 0.58 |
|  | C47 | 146 | 25.0 | 0.84 | 3.75 | 3.64 | 0.57 |
|  | C48 | 162 | 25.0 | 0.84 | 3.75 | 3.64 | 0.48 |
|  | C49 | 185 | 25.0 | 0.84 | 3.73 | 3.64 | 0.44 |
|  | C50 | 194 | 25.0 | 0.84 | 3.70 | 3.64 | 0.43 |
|  | C51 | 208 | 25.0 | 0.82 | 3.73 | 3.64 | 0.50 |
| L-KCl-200 | C52 | 287 | 25.0 | 0.88 | 3.80 | 3.66 | 0.64 |
|  | C53 | 304 | 25.0 | 0.87 | 3.79 | 3.66 | 0.55 |
|  | C54 | 313 | 25.0 | 0.87 | 3.76 | 3.66 | 0.52 |
|  | C55 | 329 | 25.0 | 0.87 | 3.76 | 3.66 | 0.45 |
|  | C56 | 339 | 25.0 | 0.87 | 3.77 | 3.66 | 0.43 |
|  | C57 | 353 | 25.0 | 0.87 | 3.77 | 3.66 | 0.37 |
|  | C58 | 376 | 25.0 | 0.86 | 3.76 | 3.66 | 0.36 |
|  | C59 | 385 | 25.0 | 0.87 | 3.73 | 3.66 | 0.34 |
|  | C60 | 400 | 25.0 | 0.86 | 3.72 | 3.66 | 0.31 |
|  | C61 | 410 | 25.0 | 0.86 | 3.74 | 3.66 | 0.36 |
|  | C62 | 431 | 25.0 | 0.87 | 3.72 | 3.66 | 0.30 |
| L-CaCl2-200 | C63 | 497 | 25.0 | 0.86 | 3.65 | 3.61 | 0.22 |
|  | C64 | 506 | 25.0 | 0.86 | 3.65 | 3.61 | 0.21 |
|  | C65 | 526 | 25.0 | 0.86 | 3.63 | 3.61 | 0.18 |
|  | C66 | 544 | 25.0 | 0.86 | 3.64 | 3.61 | 0.17 |
|  | C67 | 553 | 25.0 | 0.86 | 3.65 | 3.61 | 0.17 |
|  | C68 | 568 | 25.0 | 0.86 | 3.65 | 3.61 | 0.18 |
|  | C69 | 578 | 25.0 | 0.86 | 3.65 | 3.61 | 0.17 |
|  | C70 | 592 | 25.0 | 0.86 | 3.65 | 3.61 | 0.19 |
|  | C71 | 602 | 25.0 | 0.86 | 3.65 | 3.61 | 0.17 |
|  | C72 | 616 | 25.0 | 0.86 | 3.65 | 3.61 | 0.18 |
|  | C73 | 626 | 25.0 | 0.86 | 3.65 | 3.61 | 0.19 |
|  | C74 | 637 | 25.0 | 0.86 | 3.65 | 3.61 | 0.17 |
|  | C75 | 650 | 25.0 | 0.85 | 3.64 | 3.61 | 0.18 |
|  | C76 | 667 | 25.0 | 0.85 | 3.69 | 3.61 | 0.34 |
| L-MgCl2-200 | C77 | 736 | 25.0 | 0.86 | 3.69 | 3.65 | 0.24 |
|  | C78 | 745 | 25.0 | 0.86 | 3.68 | 3.65 | 0.25 |
|  | C79 | 760 | 25.0 | 0.85 | 3.69 | 3.65 | 0.23 |
|  | C80 | 770 | 25.0 | 0.86 | 3.68 | 3.65 | 0.27 |
|  | C81 | 784 | 25.0 | 0.86 | 3.69 | 3.65 | 0.28 |
|  | C82 | 794 | 25.0 | 0.86 | 3.69 | 3.65 | 0.26 |
|  | C83 | 808 | 25.0 | 0.86 | 3.69 | 3.65 | 0.27 |
|  | C84 | 818 | 25.0 | 0.86 | 3.70 | 3.65 | 0.26 |
|  | C85 | 838 | 25.0 | 0.86 | 3.70 | 3.65 | 0.26 |
|  | C86 | 857 | 25.0 | 0.85 | 3.67 | 3.65 | 0.24 |
|  | C87 | 865 | 25.0 | 0.86 | 3.68 | 3.65 | 0.23 |
|  | C88 | 880 | 25.0 | 0.85 | 3.69 | 3.65 | 0.23 |
|  | C89 | 890 | 25.0 | 0.86 | 3.69 | 3.65 | 0.24 |
